# Supplementary material
Source: ML conference proceedings conference paper supplement (https://openreview.net/forum?id=O24OhmqpJtP)
Supplement: supplementary_material [file attachment]

## Checklist

The checklist follows the references. Please read the checklist guidelines carefully for information on how to answer these questions. For each question, change the default **[TODO]** to **[Yes]**, **[No]**, or **[N/A]**. You are strongly encouraged to include a **justification to your answer**, either by referencing the appropriate section of your paper or providing a brief inline description. For example:

- Did you include the license to the code and datasets? **[Yes]** See Section
- Did you include the license to the code and datasets? **[No]** The code and the data are proprietary.
- Did you include the license to the code and datasets? **[N/A]**

Please do not modify the questions and only use the provided macros for your answers. Note that the Checklist section does not count towards the page limit. In your paper, please delete this instructions block and only keep the Checklist section heading above along with the questions/answers below.

### 1. For all authors...

- (a) Do the main claims made in the abstract and introduction accurately reflect the paper's contributions and scope? **[Yes]**
- (b) Did you describe the limitations of your work? **[Yes]**
- (c) Did you discuss any potential negative social impacts of your work? **[N/A]**
- (d) Have you read the ethics review guidelines and ensured that your paper conforms to them? **[Yes]**

### 2. If you are including theoretical results...

- (a) Did you state the full set of assumptions of all theoretical results? **[N/A]**
- (b) Did you include complete proofs of all theoretical results? **[N/A]**

### 3. If you ran experiments (e.g. for benchmarks)...

- (a) Did you include the code, data, and instructions needed to reproduce the main experimental results (either in the supplemental material or as a URL)? **[Yes]** See our repository link in the introduction.
- (b) Did you specify all the training details (e.g., data splits, hyperparameters, how they were chosen)? **[No]** We used pre-defined configurations from previous work.
- (c) Did you report error bars (e.g., concerning the random seed after running experiments multiple times)? **[Yes]**
- (d) Did you include the total amount of computing and the type of resources used (e.g., type of GPUs, internal cluster, or cloud provider)? **[No]**

### 4. If you are using existing assets (e.g., code, data, models) or curating/releasing new assets...

- (a) If your work uses existing assets, did you cite the creators? **[Yes]**
- (b) Did you mention the license of the assets? **[No]** They are included in the cited publications.
- (c) Did you include any new assets either in the supplemental material or as a URL? **[Yes]**
- (d) Did you discuss whether and how consent was obtained from people whose data you're using/curating? **[No]** We are using open-sourced assets.
- (e) Did you discuss whether the data you are using/curating contains personally identifiable information or offensive content? **[N/A]**

### 5. If you used crowdsourcing or researched with human subjects...

- (a) Did you include the full text of instructions given to participants and screenshots, if applicable? **[N/A]**
- (b) Did you describe any potential participant risks, with links to Institutional Review Board (IRB) approvals, if applicable? **[N/A]**
- (c) Did you include the estimated hourly wage paid to participants and the total amount spent on participant compensation? **[N/A]**

## 482 A Datasheet

### 483 A.1 Motivation

- 484 • **For what purpose was the dataset created?** In order to benchmark easily new methods  
485 on HPO and transfer HPO.
- 486 • **Who create the dataset and on behalf of which entity?** The authors of the main paper  
487 work together on behalf of their respective institution.
- 488 • **Who funded the creation of the dataset?** University of Freiburg, University of Hildesheim  
489 and Amazon.

### 490 A.2 Composition

- 491 • **What do the instances that comprises the dataset represent?** They represent evaluations  
492 of hyperparameter configurations on different tasks.
- 493 • **How many instances are there in total?** Around 6.4 million hyperparameter evaluations.
- 494 • **Does the dataset contain all possible instances or is it a sample of instances from a  
495 larger set?** No, they correspond only to evaluations of supervised classifiers and queried  
496 from OpenML platform.
- 497 • **What data does each instance consist of?** Each instance consist of a hyperparameter  
498 configuration, with their respective values and response.
- 499 • **Is there a label or target associated with each instance?** Yes, the associated accuracy  
500 (validation accuracy).
- 501 • **Is any information missing from individual instances?** No. The missing values have  
502 been imputed.
- 503 • **Are relationships between individual instances made explicit?** No.
- 504 • **Are there recommended data splits?** Yes, we recommend three splits for meta-train,  
505 meta-validation and meta-test.
- 506 • **Are there any errors, sources of noise or redundancies in the dataset?** Yes, the evalua-  
507 tions rely on third parties that may have committed mistakes in reporting the response or  
508 hyperparameter configuration values.
- 509 • **Is the dataset self-contained or does it link to or otherwise rely on external resources?**  
510 For the creation, it relied on data from OpenML.
- 511 • **Does the dataset contain data that might be considered confidential?** No.
- 512 • **Does the dataset contain data that, if viewed directly, might be offensive, insulting,  
513 threatening or might otherwise cause anxiety?** No.
- 514 • **Does the dataset relate to people?** No.
- 515 • **Does the dataset identify any sub-populations?** No.
- 516 • **Is it possible to identify individuals, either directly or indirectly?** No.
- 517 • **Does the dataset contain data that might be considered sensitive in any way?** No.

### 518 A.3 Collection process

- 519 • **How was the data associated with each instance acquired?** We queried the existing runs  
520 (evaluations) with tag `Verified_Supervised_Classification` from OpenML.
- 521 • **What mechanisms or procedures were used to collect the data?** We used the Python  
522 API for fetching the data.
- 523 • **Who was involved in the data collection process?** Only the authors of this paper.
- 524 • **Over what time frame was the data collected?** The existing runs until April 15, 2021.
- 525 • **Were any ethical review process conducted?** No.
- 526 • **Does the dataset relate to people?** No.

- **Did you collect the data from the individuals in question, or obtained it via third parties or other sources?** It was obtained from OpenML website.
- **Was any preprocessing/cleaning/labeling of the data done?** Yes, it is explain in section 5.
- **Was the "raw" data saved in addition to the preprocessed/cleaned/labeled data?** No, but the raw data can be accessed through OpenML platform.
- **Is the software used to preprocess/clean/label the instances available?** No.

#### 534 A.4 Uses

- **Has the dataset been used for any tasks already?** Yes, we provide examples in section 7.
- **Is there a repository that links to any or all papers or systems that use the dataset?** Yes, it is available in <https://github.com/releaunifreiburg/HPO-B>.
- **What (other) tasks could the dataset be used for?** HPO and transfer HPO.
- **Is there anything about the composition of the dataset or the way it was collected and preprocessed/cleaned/labeled that might impact future uses?** No.
- **Are there tasks for which the dataset should not be used?** No.

#### 542 A.5 Distribution

- **Will the dataset be distributed to third parties outside of the entity?** Yes, the dataset is publicly available.
- **How will the dataset be distributed?** Through a link hosted in our repository <https://github.com/releaunifreiburg/HPO-B>.
- **When will the dataset be distributed?** From June 8. 2021.
- **Will the dataset be distributed under a copyright or other intellectual property license?** Yes, license CC-BY.
- **Have any third parties imposed IP-based or other restrictions on the data associated with the instances?** No.
- **Do any export controls or other regulatory restrictions apply to the dataset or to individual instances?** No.

#### 554 A.6 Maintenance

- **Who will be supporting/hosting/maintaining the dataset?** RELEA group from the University of Freiburg.
- **How can the owner/curator/manager of the dataset be contacted?** Questions can be sent to [pineda@cs.uni-freiburg.de](mailto:pineda@cs.uni-freiburg.de) or submit an issue to the Github repository <https://github.com/releaunifreiburg/HPO-B>.
- **Is there an erratum?** No.
- **Will the dataset be updated?** No.
- **Will older versions of the dataset continue to be supported/hosted/maintained?** As new runs (evaluations) might be available in OpenML, we consider to update it periodically.
- **If other want to extend/augment/build on/contributed to the dataset, is there a mechanism for them to do so?** We might provide this possibility in the future.

### 566 B License

567 The meta-dataset is provided under a license CC-BY.

### 568 C Accessibility

569 The link to access the meta-dataset and recommendations on how to consume it are given in the  
570 following git-hub repository: <https://github.com/releaunifreiburg/HPO-B>.

## D Maintenance

We are planning to increase the meta-data set, as new search spaces with a considerable amount of evaluations are available on the platform. We may also add evaluations from third parties that agree to be part of the meta-dataset. For any suggestion or technical inquiry, we recommend to use the issue tracker of our repository.

## E Additional Meta-dataset Statistics

In this section, we present further descriptive statistics of the meta-dataset. The histogram in Figure 6a depicts how many search spaces (out of the 176) contain a specific number of evaluations. At the task level, the histogram shows a similar pattern in Figure 6b. The Figures 6c and 6d show respectively the percentage of search spaces and tasks with *at least* a given number of evaluations. As can be seen, 50% of the tasks have at least 20000 evaluations, and at least 30% contain 40.000 evaluations (out of 1907 tasks).

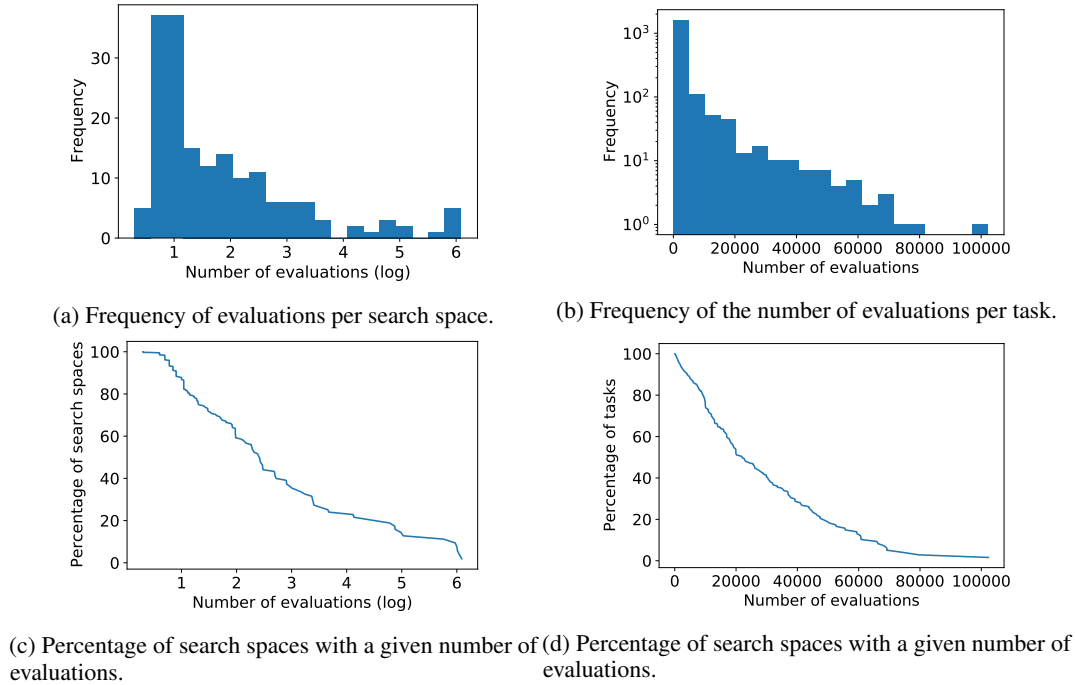

Figure 6: Descriptors for the number of evaluations.

On another discourse, the distribution of the response per search-space in the meta-test split can be observed in Figure 7. It is noticeable that the distributions are multi-modal, due to the fact that they correspond to the aggregated response of aggregated tasks. It shows how every task has its own scale. A more-detailed insight of the distribution per dataset is shown in the Figure 8.

## F Additional Results

Figures 9, 10, 12, 11, and 15 show the results of the average regret and rank, computed per task for transfer, non-transfer and acquisition methods. Figure 13 provides a comparison between transfer and non-transfer methods with respect to the average rank. Moreover, Figure 14 presents detailed results for the average rank with different acquisition functions, which summarized in the main paper.

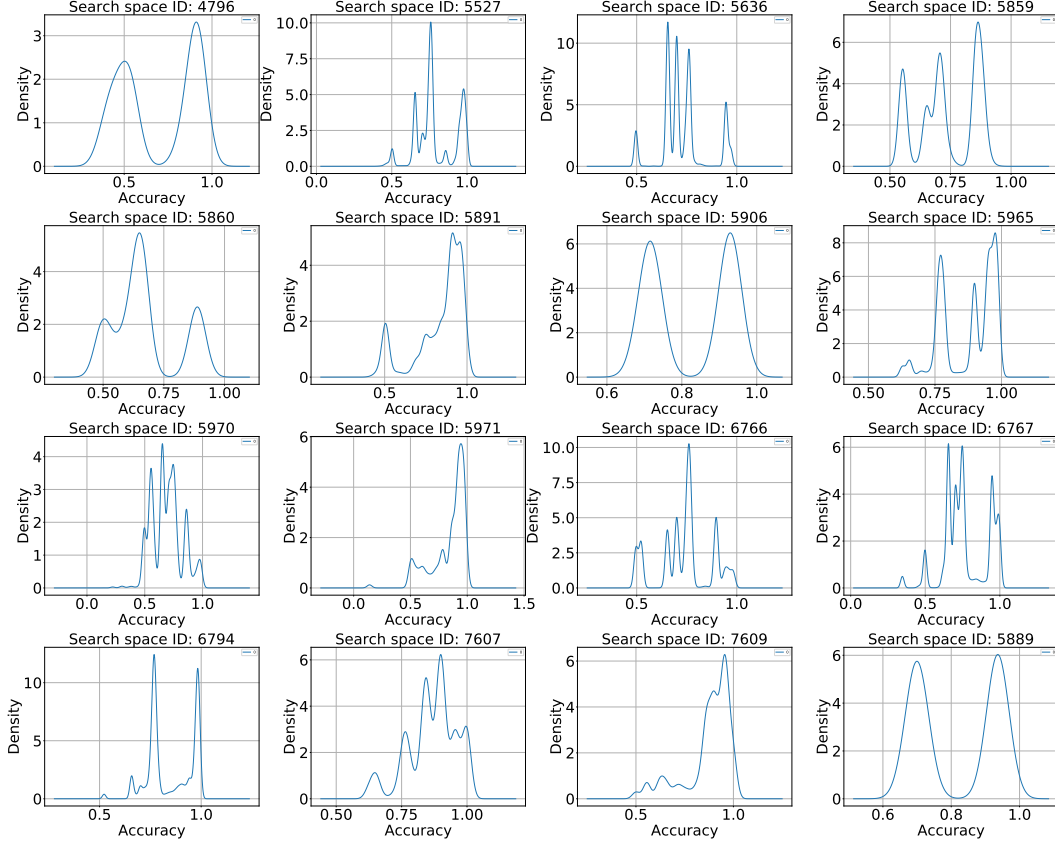

Figure 7: Density distribution of the response per search-space.

## G Further Data-Preprocessing Details

We explain in more details the data-extraction and pre-processing details for the benchmark. Additional information can also be obtained from the codebase in our repository. In the following explanation, a flow refers to a specific algorithm or search space.

- We list all the existing flows under the tag *Supervised Verified Classification*. Once we get the flows, we query all the IDs of the runs associated with this flows. As this process may overcharge the server, we perform it in batches.
- Subsequently, we perform a selection of flows and datasets by considering only those runs ID from dataset-flow instances (tasks) that contain more than 5 runs in total. This aims to decrease the number of runs from noisy small tasks.
- We query the actual runs. As this process may overload the servers, we perform it in batches. From all the information returned by the API in a Python-like dictionary, we just keep the keys *run\_id*, *task\_id*, *flow\_name*, *accuracy* and *parameter settings*. The last one refers to the specific hyperparameter configuration.
- As the hyperparameter configurations come as strings, we recast the values to either *string*, *float* or *integer*.
- We eliminate repeated evaluations and filter out tasks with only one evaluation.
- We group all the evaluations from the same flow but different datasets into a single data-frame. This allows having a single view of all the hyperparameter configurations used across datasets for the specific flow.
- We one-hot encode the categorical hyperparameters. Afterward, as some hyperparameter values may be missing for some datasets within a flow, we input missing values by setting

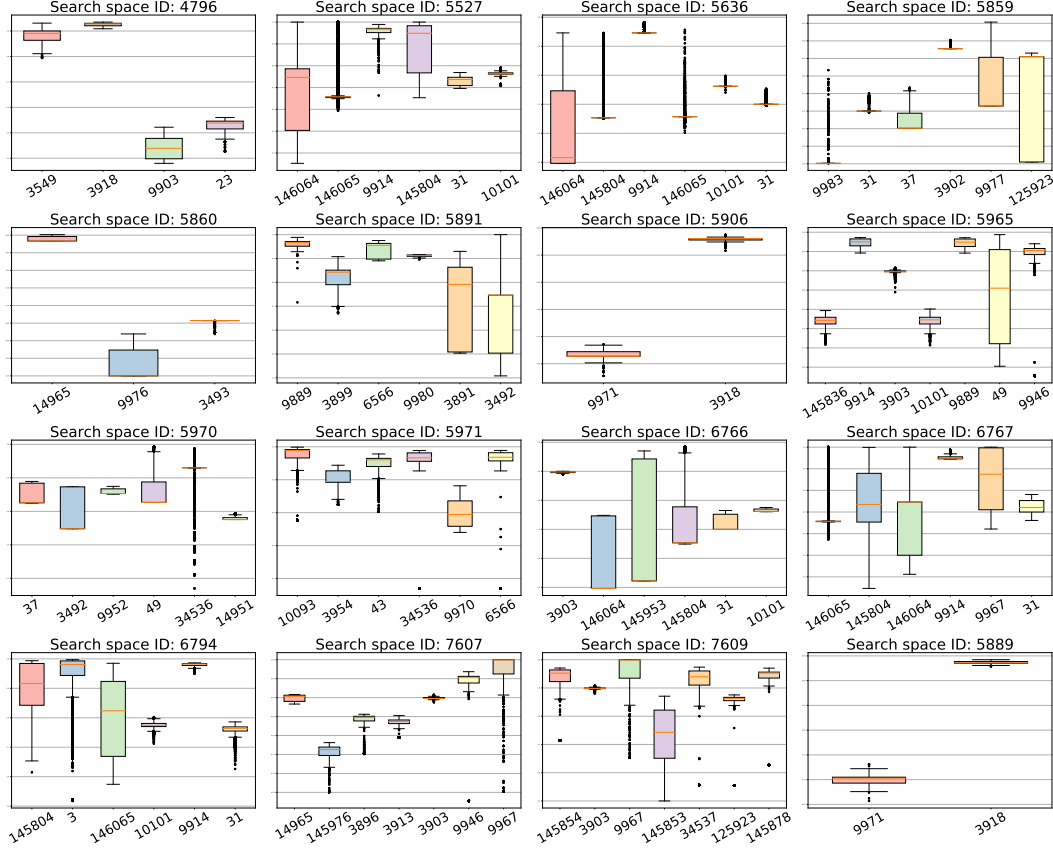

Figure 8: Distribution of the response (accuracy) per task in meta-test (Box-plot ranges are between 0 and 1).

- 614 them to zero. After imputation, we create an additional indicator variable per hyperparameter  
615 so that it is 1 if the value was imputed for the configuration and zero otherwise.
- 616 • We get rid of hyperparameters which only have one value among the whole flow, as they are  
617 not a differential feature useful for assessing the performance.
  - 618 • We apply the logarithmic transformation to a manually selected group of hyperparameters.
  - 619 • Finally, we normalize the values per hyperparameter across the whole flow, so that they vary  
620 between 0 and 1. We do not scale the response.

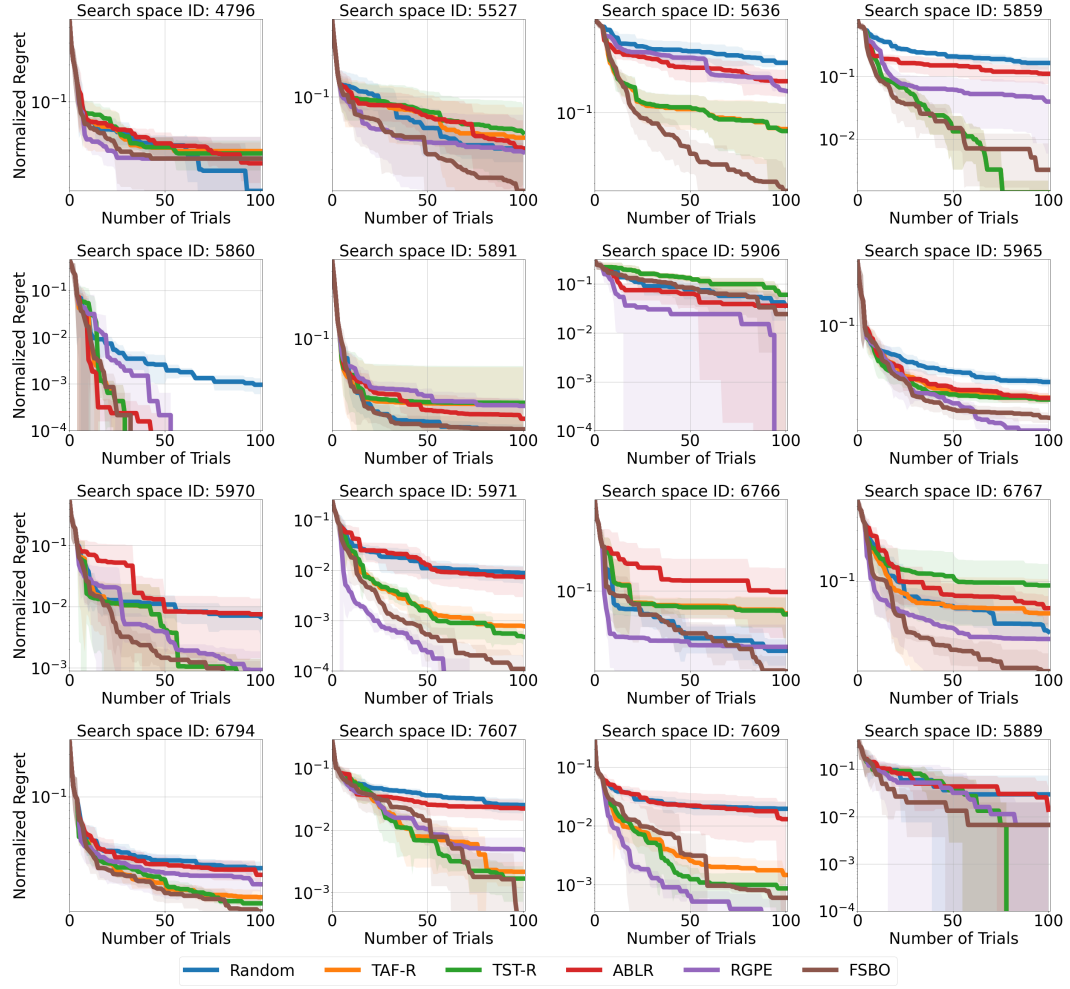

Figure 9: **Normalized regret** comparison of **transfer learning** HPO methods on HPO-B-v3

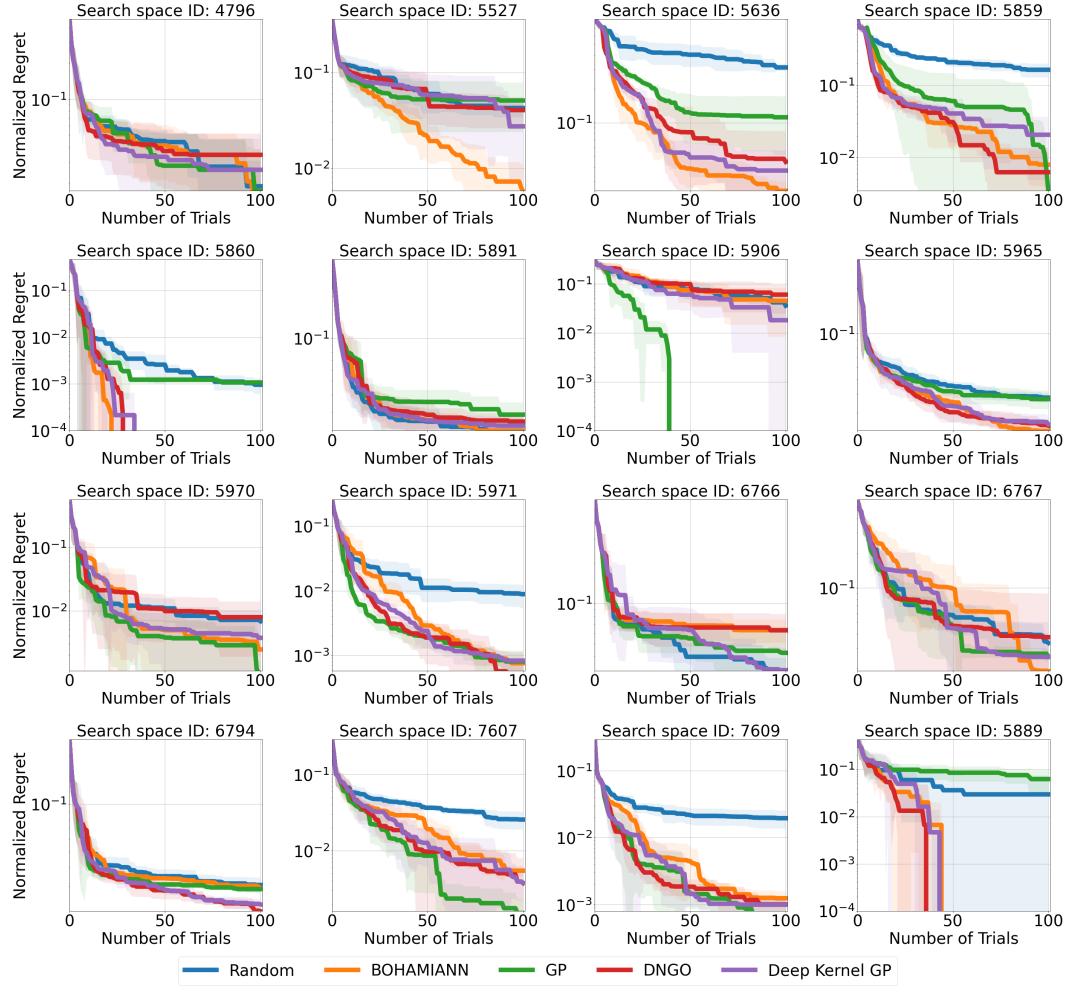

Figure 10: **Normalized regret** comparison of **non-transfer** black-box HPO methods on HPO-B-v2



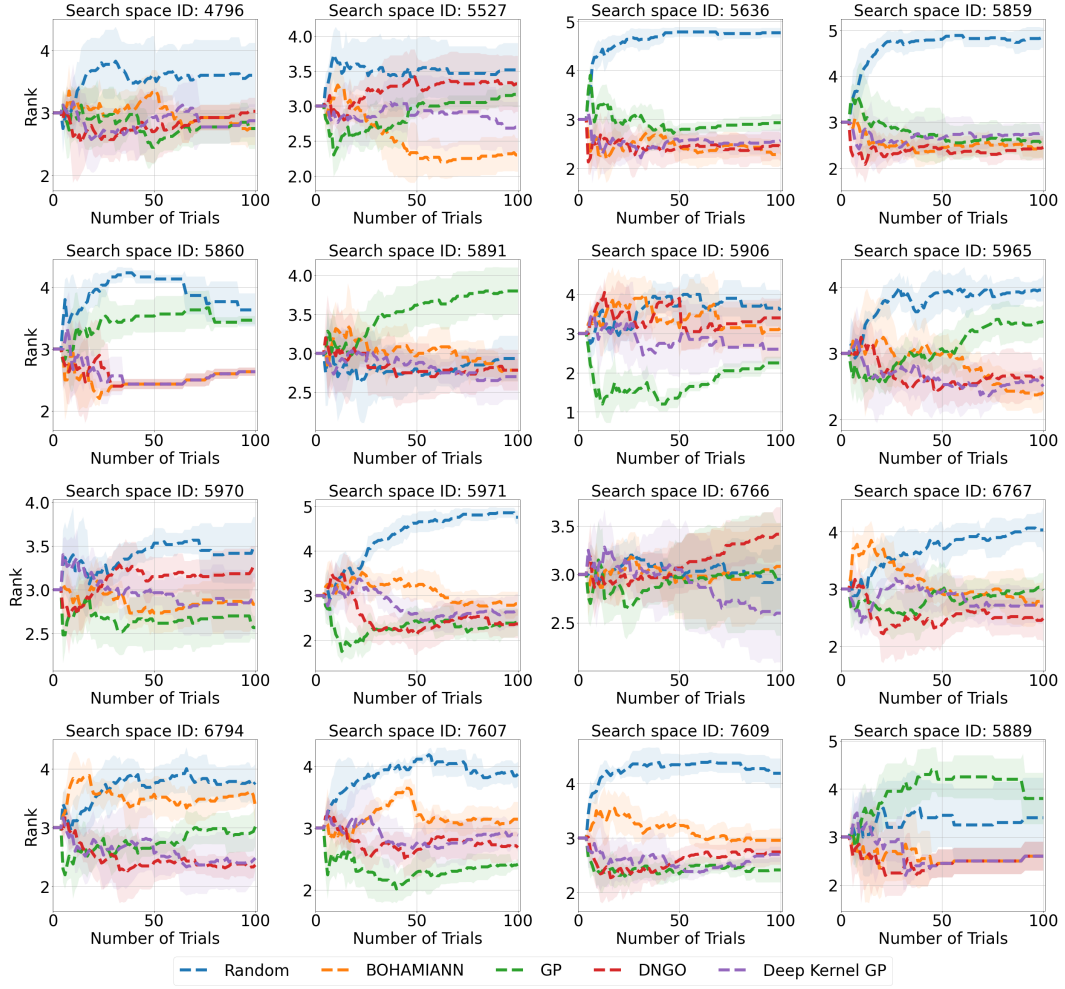

Figure 11: **Mean rank** comparison of **non-transfer** black-box HPO methods

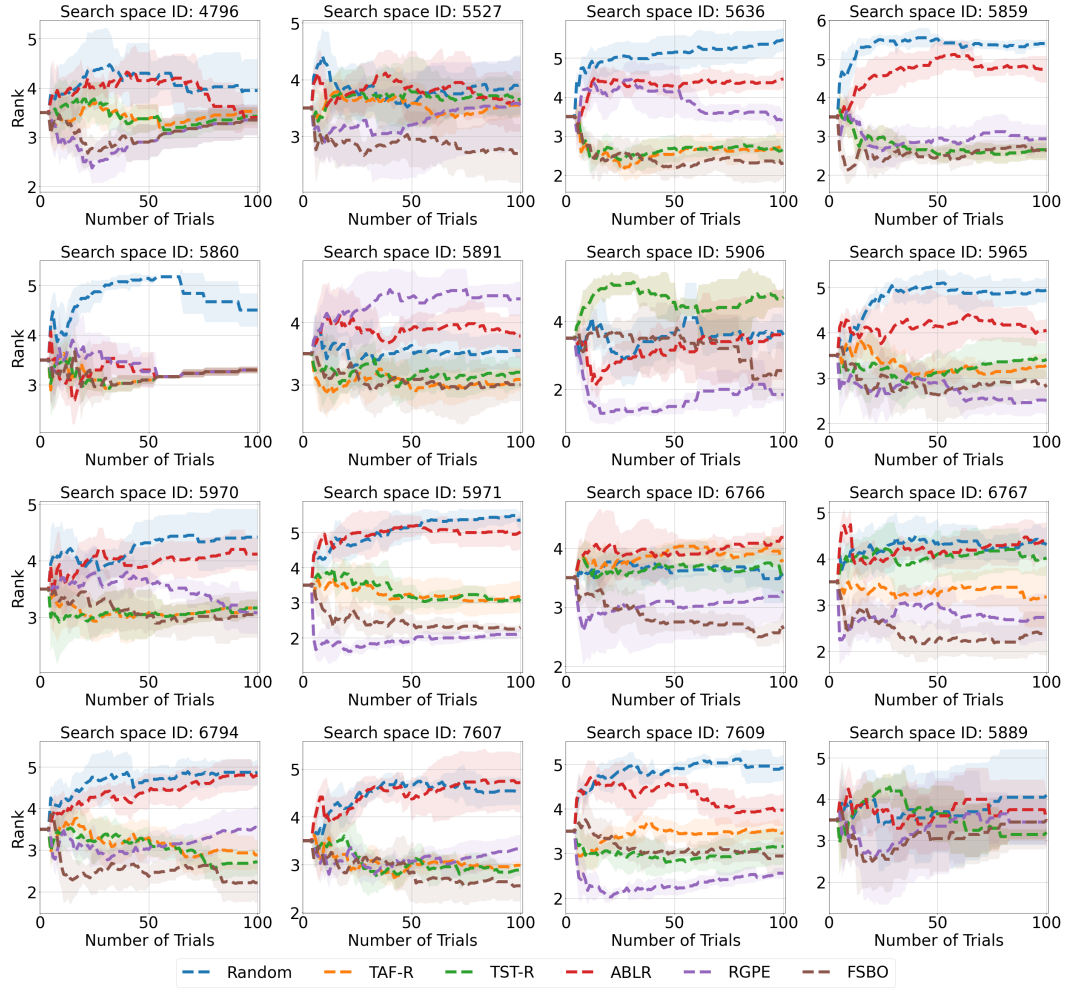

Figure 12: Mean rank comparison of transfer learning black-box HPO methods

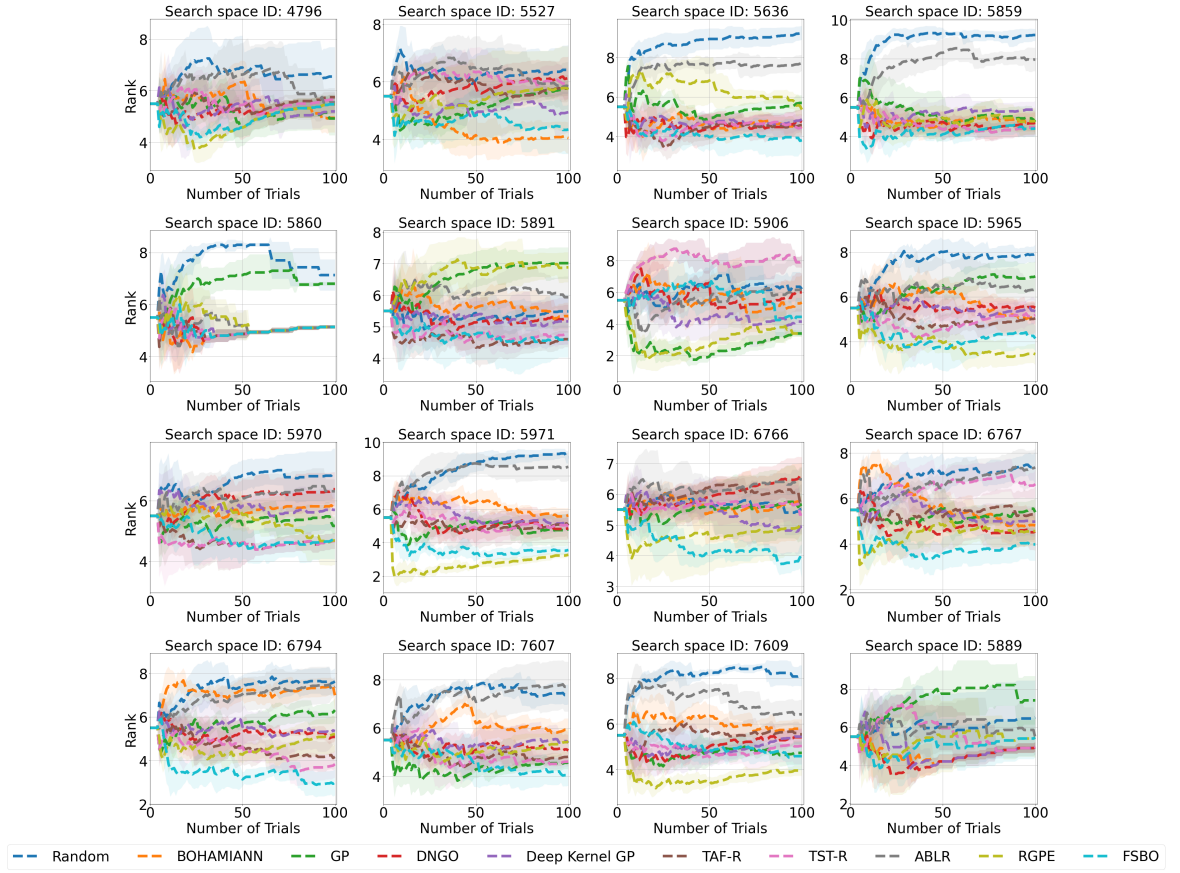

Figure 13: **Mean rank** comparison of **non-transfer** and **transfer learning** black-box HPO methods

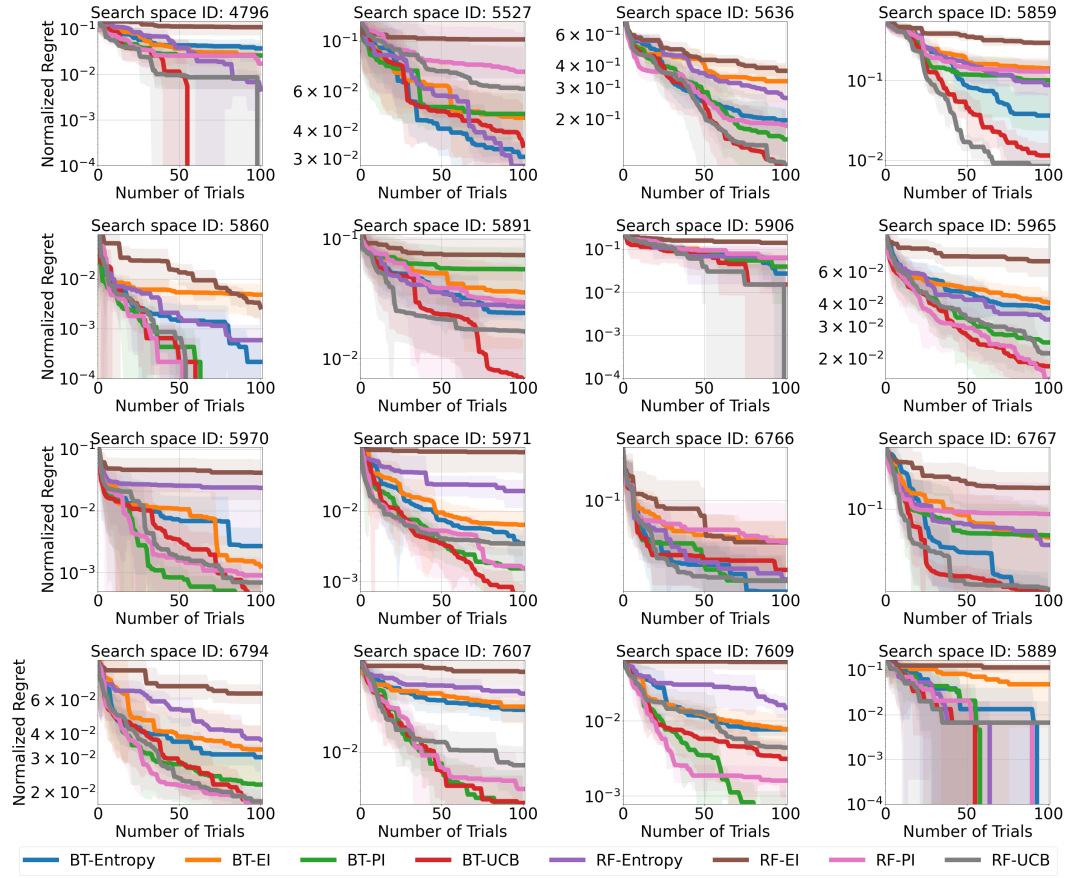

Figure 14: **Normalized regret** comparison of different acquisition functions: Expected Improvement (EI), Entropy (E) and Upper Confidence Bound (UCB) for Random Forest (RF) and Boosted Trees (BT) as surrogates.

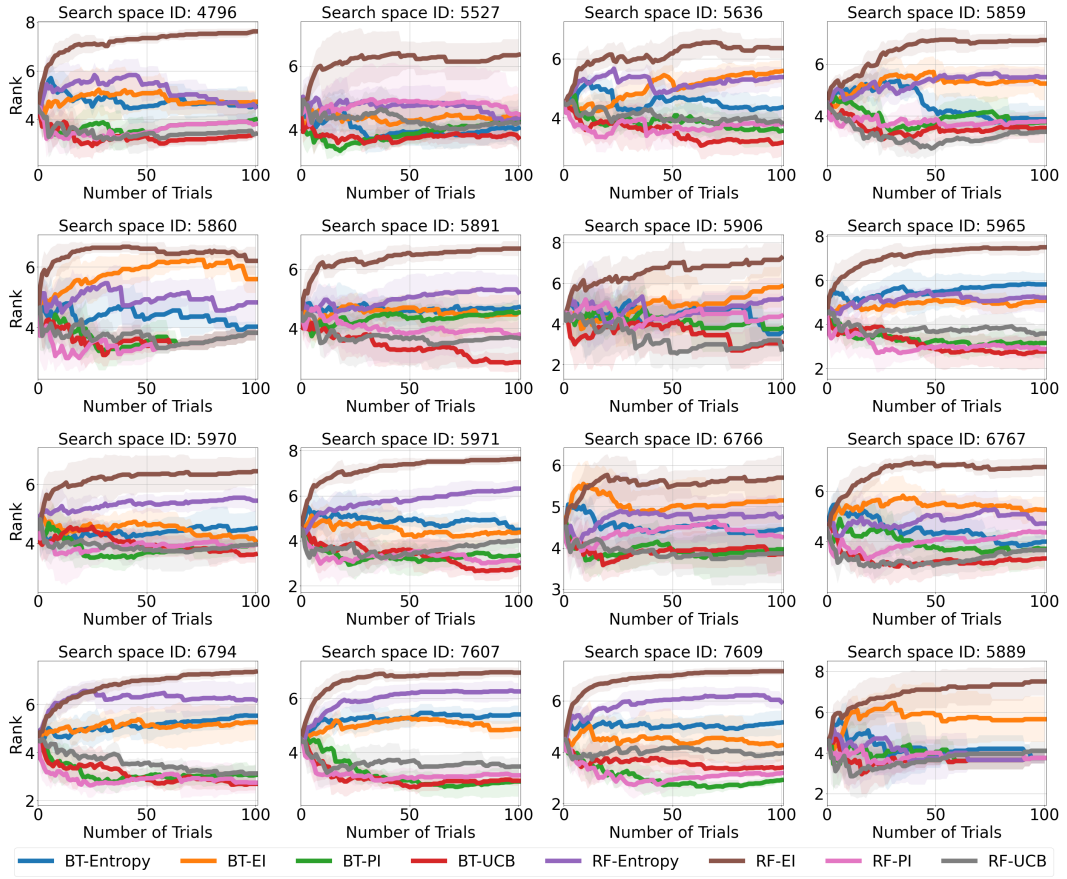

Figure 15: **Mean rank** comparison of different acquisition functions

Table 4: Hyperparameters of the search spaces HPO-B-v2/-v3

| Search Space Id | Search Name             | Space | List of hyperparameters within the Search-space                                                                                                                                                                                                               |
|-----------------|-------------------------|-------|---------------------------------------------------------------------------------------------------------------------------------------------------------------------------------------------------------------------------------------------------------------|
| 4796            | mlr.classif.rpart       |       | minsplit, minbucket, cp                                                                                                                                                                                                                                       |
| 5527            | mlr.classif.svm (6)     |       | cost, gamma, gamma.na, degree, degree.na, kernel.ohe.na, kernel.ohe.linear, kernel.ohe.polynomial                                                                                                                                                             |
| 5636            | mlr.classif.rpart (29)  |       | minsplit, minsplit.na, minbucket, cp, maxdepth, maxdepth.na                                                                                                                                                                                                   |
| 5859            | mlr.classif.rpart (31)  |       | minsplit, minsplit.na, minbucket, cp, maxdepth, maxdepth.na                                                                                                                                                                                                   |
| 5860            | mlr.classif.glmnet (4)  |       | alpha, lambda                                                                                                                                                                                                                                                 |
| 5891            | mlr.classif.svm (7)     |       | cost, gamma, gamma.na, degree, degree.na, kernel.ohe.na, kernel.ohe.linear, kernel.ohe.polynomial                                                                                                                                                             |
| 5906            | mlr.classif.xgboost (4) |       | eta, max_depth, max_depth.na, min_child_weight, min_child_weight.na, subsample, colsample_bytree, colsample_bytree.na, colsample_bylevel, colsample_bylevel.na, lambda, alpha, nrounds, nrounds.na, booster.ohe.na, booster.ohe.gblinear                      |
| 5965            | mlr.classif.ranger(9)   |       | num.trees, num.trees.na, mtry, sample.fraction, min.node.size, min.node.size.na, replace.ohe.FALSE, replace.ohe.na, respect.unordered.factors.ohe.INVALID, respect.unordered.factors.ohe.TRUE                                                                 |
| 5970            | mlr.classif.glmnet(5)   |       | alpha, lambda                                                                                                                                                                                                                                                 |
| 5971            | mlr.classif.xgboost (6) |       | eta, max_depth, max_depth.na, min_child_weight, min_child_weight.na, subsample, colsample_bytree, colsample_bytree.na, colsample_bylevel, colsample_bylevel.na, lambda, alpha, nrounds, nrounds.na, booster.ohe.na, booster.ohe.gblinear                      |
| 6766            | mlr.classif.glmnet (11) |       | alpha, lambda                                                                                                                                                                                                                                                 |
| 6767            | mlr.classif.xgboost (9) |       | eta, subsample, lambda, alpha, nthread, nthread.na, nrounds, nrounds.na, max_depth, max_depth.na, min_child_weight, min_child_weight.na, colsample_bytree, colsample_bytree.na, colsample_bylevel, colsample_bylevel.na, booster.ohe.na, booster.ohe.gblinear |
| 6794            | mlr.classif.ranger(13)  |       | num.trees, num.trees.na, mtry, sample.fraction, min.node.size, min.node.size.na, replace.ohe.FALSE, replace.ohe.na, respect.unordered.factors.ohe.na, respect.unordered.factors.ohe.TRUE                                                                      |
| 7607            | mlr.classif.ranger(15)  |       | num.trees, num.trees.na, mtry, min.node.size, sample.fraction, respect.unordered.factors.ohe.na, respect.unordered.factors.ohe.TRUE, replace.ohe.FALSE, replace.ohe.na                                                                                        |
| 7609            | mlr.classif.ranger(16)  |       | num.trees, num.trees.na, mtry, min.node.size, sample.fraction, respect.unordered.factors.ohe.na, respect.unordered.factors.ohe.TRUE, replace.ohe.FALSE, replace.ohe.na                                                                                        |
| 5889            | mlr.classif.ranger(7)   |       | num.trees, num.trees.na, mtry, sample.fraction, replace.ohe.FALSE, replace.ohe.na                                                                                                                                                                             |

Table 5: All the search-spaces contained in HPO-B-v1

| Search Space ID | Eval.  | Datasets | Dim. | Search Space Name                                                            |
|-----------------|--------|----------|------|------------------------------------------------------------------------------|
| 151             | 25     | 5        | 1    | weka.LMT                                                                     |
| 5886            | 295    | 33       | 9    | weka.J48                                                                     |
| 5918            | 192    | 32       | 13   | weka.IBk                                                                     |
| 5920            | 207    | 29       | 20   | weka.MultilayerPerceptron                                                    |
| 5923            | 265    | 32       | 16   | weka.RandomForest                                                            |
| 5926            | 83     | 32       | 10   | weka.SMO_PolyKernel                                                          |
| 5978            | 279    | 31       | 17   | weka.AttributeSelectedClassifier_J48                                         |
| 6007            | 248    | 31       | 15   | weka.AttributeSelectedClassifier_RandomForest                                |
| 6073            | 192    | 32       | 16   | weka.AttributeSelectedClassifier_IBk                                         |
| 6105            | 256    | 32       | 53   | weka.FilteredClassifier_RandomForest                                         |
| 6136            | 300    | 30       | 8    | weka.FilteredClassifier_J48                                                  |
| 6140            | 186    | 31       | 19   | weka.FilteredClassifier_IBk                                                  |
| 6154            | 186    | 31       | 17   | weka.FilteredClassifier-<br>_AttributeSelectedClassifier_IBk                 |
| 6183            | 64     | 32       | 41   | weka.FilteredClassifier_SMO_PolyKernel                                       |
| 6447            | 270    | 30       | 2    | weka.FilteredClassifier-<br>_AttributeSelectedClassifier_J48                 |
| 6458            | 240    | 30       | 3    | weka.FilteredClassifier-<br>_AttributeSelectedClassifier_RandomForest        |
| 534             | 302    | 65       | 1    | weka.Bagging_SMO_PolyKernel                                                  |
| 4796            | 10694  | 36       | 3    | mlr.classif.rpart.preproc                                                    |
| 5499            | 20     | 2        | 12   | sklearn.svm.classes.SVC                                                      |
| 5988            | 19     | 8        | 31   | weka.AttributeSelectedClassifier-<br>_SMO_PolyKernel                         |
| 5584            | 12     | 2        | 6    | sklearn.tree.tree.ExtraTreeClassifier                                        |
| 189             | 8      | 2        | 1    | weka.MultiBoostAB_JRip                                                       |
| 7064            | 7      | 1        | 8    | rm.process.polynomial_by_binomial-<br>_classification_support_vector_machine |
| 5527            | 385115 | 51       | 8    | mlr.classif.svm                                                              |
| 5636            | 503439 | 54       | 6    | mlr.classif.rpart                                                            |
| 5859            | 58809  | 56       | 6    | mlr.classif.rpart                                                            |
| 5860            | 3100   | 27       | 2    | mlr.classif.glmnet                                                           |
| 5890            | 1740   | 58       | 2    | mlr.classif.kknn                                                             |
| 5891            | 44091  | 51       | 8    | mlr.classif.svm                                                              |
| 5906            | 2289   | 24       | 16   | mlr.classif.xgboost                                                          |
| 5965            | 414678 | 60       | 10   | mlr.classif.ranger                                                           |
| 5968            | 918    | 8        | 8    | mlr.classif.ranger                                                           |
| 5970            | 68300  | 55       | 2    | mlr.classif.glmnet                                                           |
| 5971            | 44401  | 52       | 16   | mlr.classif.xgboost                                                          |
| 6308            | 1498   | 3        | 2    | mlr.classif.glmnet                                                           |
| 6762            | 4746   | 7        | 6    | mlr.classif.rpart                                                            |
| 6766            | 599056 | 51       | 2    | mlr.classif.glmnet                                                           |
| 6767            | 491497 | 52       | 18   | mlr.classif.xgboost                                                          |
| 6794            | 591831 | 52       | 10   | mlr.classif.ranger                                                           |
| 6856            | 2      | 1        | 1    | mlr.classif.randomForest                                                     |
| 7188            | 298    | 35       | 1    | mlr.classif.ranger.imputed.dummied.preproc                                   |
| 7189            | 2324   | 40       | 3    | mlr.classif.rpart.imputed.dummied.preproc                                    |
| 7190            | 1215   | 32       | 3    | mlr.classif.RRF.imputed.dummied.preproc                                      |
| 7607            | 18686  | 58       | 9    | mlr.classif.ranger                                                           |
| 7609            | 41631  | 59       | 9    | mlr.classif.ranger                                                           |
| 5624            | 2486   | 5        | 7    | mlr.classif.rpart                                                            |
| 124             | 13     | 2        | 1    | weka.MultilayerPerceptron                                                    |

|      |       |    |    |                                                                    |
|------|-------|----|----|--------------------------------------------------------------------|
| 153  | 5     | 1  | 1  | weka.Bagging_RandomTree                                            |
| 243  | 5     | 1  | 1  | weka.RotationForest_PrincipalComponents_J48                        |
| 245  | 5     | 1  | 1  | weka.RotationForest_PrincipalComponents-<br>_REPTree               |
| 246  | 5     | 1  | 1  | weka.RotationForest_PrincipalComponents-<br>_RandomTree            |
| 247  | 5     | 1  | 1  | weka.RotationForest_PrincipalComponents-<br>_RandomForest          |
| 248  | 5     | 1  | 1  | weka.RotationForest_PrincipalComponents-<br>_LMT                   |
| 423  | 10    | 2  | 1  | weka.AdaBoostM1_SMO_PolyKernel                                     |
| 506  | 34    | 9  | 1  | weka.RotationForest_PrincipalComponents_J48                        |
| 633  | 5     | 1  | 1  | weka.RotationForest_PrincipalComponents-<br>_LMT                   |
| 2553 | 4     | 1  | 1  | weka.AttributeSelectedClassifier-<br>_CfsSubsetEval_BestFirst_IBk  |
| 4006 | 8     | 2  | 1  | weka.LibSVM                                                        |
| 5526 | 149   | 7  | 2  | mlr.classif.kknn                                                   |
| 7286 | 31    | 1  | 2  | mlr.classif.glmnet                                                 |
| 7290 | 10    | 1  | 4  | mlr.classif.rpart                                                  |
| 5626 | 79    | 3  | 17 | sklearn.ensemble.gradient_boosting-<br>_GradientBoostingClassifier |
| 5889 | 1433  | 20 | 6  | mlr.classif.ranger                                                 |
| 5458 | 28    | 4  | 16 | mlr.classif.develpartykit.ctree                                    |
| 5489 | 30    | 5  | 14 | mlr.classif.develpartykit.ctree                                    |
| 4828 | 264   | 1  | 10 | mlr.classif.ksvm                                                   |
| 214  | 4     | 1  | 1  | weka.AdaBoostM1_NaiveBayes                                         |
| 6741 | 6     | 1  | 21 | weka.AttributeSelectedClassifier-<br>_MultilayerPerceptron         |
| 158  | 5     | 1  | 1  | weka.Bagging_JRip                                                  |
| 2566 | 2     | 1  | 2  | classif.IBk                                                        |
| 3894 | 49    | 4  | 6  | mlr.classif.rpart.preproc                                          |
| 6003 | 13537 | 2  | 18 | mlr.classif.xgboost                                                |
| 6765 | 1002  | 3  | 2  | mlr.classif.glmnet                                                 |
| 5963 | 809   | 2  | 15 | mlr.classif.xgboost                                                |
| 6000 | 496   | 1  | 2  | mlr.classif.glmnet                                                 |
| 6322 | 525   | 2  | 8  | mlr.classif.svm                                                    |
| 5623 | 795   | 3  | 3  | mlr.classif.glmnet                                                 |
| 5969 | 2543  | 4  | 8  | mlr.classif.svm                                                    |
| 3737 | 2     | 1  | 2  | mlr.classif.randomForest                                           |
| 829  | 4     | 1  | 4  | weka.Stacking_REPTree                                              |
| 833  | 5     | 1  | 5  | weka.Stacking_ZeroR                                                |
| 935  | 6     | 1  | 4  | weka.LogitBoost_RandomSubSpace_REPTree                             |
| 6323 | 30    | 1  | 2  | mlr.classif.kknn                                                   |
| 7200 | 811   | 1  | 19 | mlr.classif.xgboost                                                |
| 673  | 96    | 5  | 1  | HIKNN                                                              |
| 674  | 84    | 5  | 1  | ANHBNN                                                             |
| 678  | 96    | 5  | 1  | HwKNN                                                              |
| 679  | 96    | 5  | 1  | KNN                                                                |
| 680  | 83    | 5  | 1  | NHBNN                                                              |
| 681  | 95    | 5  | 1  | HFNN                                                               |
| 682  | 95    | 5  | 1  | DWHFNN                                                             |
| 683  | 95    | 5  | 1  | CBWkNN                                                             |
| 684  | 95    | 5  | 1  | NWkNN                                                              |
| 685  | 95    | 5  | 1  | AKNN                                                               |



|      |      |   |    |                                                                 |
|------|------|---|----|-----------------------------------------------------------------|
| 688  | 11   | 1 | 1  | HubMiner.HIKNN                                                  |
| 689  | 11   | 1 | 1  | HubMiner.HwKNN                                                  |
| 690  | 11   | 1 | 1  | HubMiner.KNN                                                    |
| 691  | 4    | 1 | 1  | HubMiner.NHBNN                                                  |
| 692  | 11   | 1 | 1  | HubMiner.HFNN                                                   |
| 693  | 11   | 1 | 1  | HubMiner.DWHFNN                                                 |
| 694  | 11   | 1 | 1  | HubMiner.CBWkNN                                                 |
| 695  | 11   | 1 | 1  | HubMiner.NWKNN                                                  |
| 696  | 11   | 1 | 1  | HubMiner.AKNN                                                   |
| 697  | 11   | 1 | 1  | HubMiner.ANHBNN                                                 |
| 3994 | 64   | 5 | 1  | mlr.classif.kknn.preproc.preproc                                |
| 5964 | 506  | 2 | 9  | mlr.classif.ranger                                              |
| 5972 | 120  | 4 | 2  | mlr.classif.kknn                                                |
| 6075 | 495  | 1 | 6  | mlr.classif.rpart                                               |
| 2010 | 7    | 1 | 8  | weka.SimpleLogistic                                             |
| 2039 | 26   | 2 | 14 | weka.AdaBoostM1_RandomForest                                    |
| 2073 | 133  | 3 | 13 | weka.Bagging_LogitBoost_DecisionStump                           |
| 2277 | 202  | 3 | 15 | weka.Bagging_RandomForest                                       |
| 3489 | 141  | 3 | 12 | weka.NaiveBayes                                                 |
| 3490 | 481  | 3 | 29 | weka.J48                                                        |
| 3502 | 17   | 2 | 6  | weka.ZeroR                                                      |
| 3960 | 18   | 1 | 15 | weka.IterativeClassifierOptimizer_LogitBoost-<br>_DecisionStump |
| 4289 | 7    | 1 | 20 | weka.FilteredClassifier_J48                                     |
| 5218 | 6    | 1 | 19 | weka.FilteredClassifier_RandomForest                            |
| 5237 | 8    | 1 | 8  | weka.FilteredClassifier_RandomForest                            |
| 5253 | 2    | 1 | 2  | weka.Vote_RandomForest                                          |
| 5295 | 8    | 1 | 13 | weka.LogitBoost_DecisionStump                                   |
| 5301 | 8    | 1 | 15 | weka.Bagging_LogitBoost_DecisionStump                           |
| 5315 | 5    | 1 | 9  | weka.IBk                                                        |
| 2614 | 6    | 1 | 2  | matrixnet_on_MagicTelescope_implementation                      |
| 2629 | 35   | 1 | 6  | sklearn.ensemble.forest.RandomForestClassifier                  |
| 2793 | 8    | 1 | 12 | classif.randomForest                                            |
| 2799 | 7    | 1 | 7  | sklearn.ensemble.forest.RandomForestClassifier                  |
| 2823 | 8    | 1 | 11 | sklearn.ensemble.forest.RandomForestClassifier                  |
| 3414 | 19   | 1 | 2  | sklearn.ensemble.weight-<br>_boosting.AdaBoostClassifier        |
| 3425 | 8    | 1 | 9  | sklearn.neural_network-<br>.multilayer_perceptron.MLPClassifier |
| 3434 | 42   | 1 | 19 | sklearn.ensemble.forest.ExtraTreesClassifier                    |
| 3439 | 6    | 1 | 3  | sklearn.ensemble.weight-<br>_boosting.AdaBoostClassifier        |
| 3442 | 11   | 1 | 5  | sklearn.neighbors.classification-<br>.KNeighborsClassifier      |
| 5503 | 14   | 2 | 2  | sklearn.neighbors.classification-<br>.KNeighborsClassifier      |
| 6131 | 30   | 1 | 2  | mlr.classif.kknn                                                |
| 5435 | 2374 | 4 | 3  | mlr.classif.rpart.preproc                                       |
| 7021 | 11   | 1 | 3  | sklearn.naive_bayes.BernoulliNB                                 |
| 5502 | 6    | 1 | 8  | sklearn.tree.tree.DecisionTreeClassifier                        |
| 5521 | 11   | 1 | 3  | xgboost.sklearn.XGBClassifier                                   |
| 5604 | 6    | 1 | 12 | sklearn.ensemble.forest.ExtraTreesClassifier                    |

|      |    |   |    |                                                                                             |
|------|----|---|----|---------------------------------------------------------------------------------------------|
| 5704 | 11 | 1 | 3  | DeepForest.DeepForest                                                                       |
| 5788 | 3  | 1 | 3  | __main__.AUC_Booster                                                                        |
| 5813 | 51 | 1 | 10 | __main__.AUCLGBMClassifier                                                                  |
| 7680 | 53 | 1 | 2  | mlr.classif.glmnet                                                                          |
| 7604 | 20 | 1 | 2  | mlr.classif.kknn                                                                            |
| 5919 | 6  | 1 | 5  | weka.SimpleLogistic                                                                         |
| 5921 | 7  | 1 | 3  | weka.Bagging_J48                                                                            |
| 5922 | 9  | 1 | 10 | weka.Bagging_RandomForest                                                                   |
| 5960 | 6  | 1 | 7  | weka.AdaBoostM1_RandomForest                                                                |
| 6024 | 43 | 1 | 10 | weka.AttributeSelectedClassifier_BayesNet                                                   |
| 6124 | 5  | 1 | 18 | weka.FilteredClassifier_FilteredClassifier-<br>_RandomForest                                |
| 6134 | 6  | 1 | 11 | weka.J48                                                                                    |
| 6137 | 7  | 1 | 18 | weka.FilteredClassifier_NaiveBayes                                                          |
| 6139 | 4  | 1 | 16 | weka.FilteredClassifier_RandomTree                                                          |
| 6155 | 8  | 1 | 7  | weka.FilteredClassifier_FilteredClassifier-<br>_FilteredClassifier_IBk                      |
| 6156 | 12 | 1 | 1  | weka.FilteredClassifier_FilteredClassifier_IBk                                              |
| 6182 | 7  | 1 | 3  | weka.Bagging_FilteredClassifier_LMT                                                         |
| 6189 | 54 | 1 | 20 | weka.RandomizableFilteredClassifier-<br>_RandomForest                                       |
| 6190 | 11 | 1 | 6  | weka.RandomizableFilteredClassifier-<br>_MultilayerPerceptron                               |
| 6211 | 21 | 1 | 15 | weka.FilteredClassifier_SMO_RBFKernel                                                       |
| 6212 | 20 | 1 | 4  | weka.RandomizableFilteredClassifier-<br>_SMO_PolyKernel                                     |
| 6213 | 7  | 1 | 3  | weka.RandomizableFilteredClassifier-<br>_Bagging_RandomForest                               |
| 6215 | 13 | 1 | 10 | weka.RandomizableFilteredClassifier_J48                                                     |
| 6216 | 8  | 1 | 5  | weka.RandomizableFilteredClassifier_LMT                                                     |
| 6271 | 14 | 1 | 18 | weka.FilteredClassifier_Bagging-<br>_AdaBoostM1_J48                                         |
| 6285 | 19 | 1 | 10 | weka.FilteredClassifier_FilteredClassifier-<br>_Vote_RandomForest                           |
| 6309 | 4  | 1 | 7  | weka.FilteredClassifier_Bagging_AdaBoostM1-<br>_FilteredClassifier_J48                      |
| 6345 | 10 | 1 | 20 | weka.RandomizableFilteredClassifier-<br>_RandomTree                                         |
| 6347 | 13 | 1 | 2  | weka.Bagging_FilteredClassifier_J48                                                         |
| 6364 | 6  | 1 | 3  | weka.RandomizableFilteredClassifier_BayesNet                                                |
| 6365 | 10 | 1 | 4  | weka.RandomizableFilteredClassifier-<br>_NaiveBayes                                         |
| 6376 | 17 | 1 | 7  | weka.RandomizableFilteredClassifier-<br>_SimpleLogistic                                     |
| 6433 | 16 | 1 | 18 | weka.RandomizableFilteredClassifier-<br>_AdaBoostM1_RandomForest                            |
| 6461 | 6  | 1 | 8  | weka.NaiveBayesUpdateable                                                                   |
| 6493 | 14 | 1 | 15 | weka.FilteredClassifier_FilteredClassifier-<br>_DecisionTable                               |
| 6507 | 20 | 1 | 3  | weka.FilteredClassifier_FilteredClassifier-<br>_RandomizableFilteredClassifier_RandomForest |

Table 6: Number of evaluations per search space in the meta-test split of HPO-B-v3

| Search Space ID | Dataset ID | No. Evaluations | Space ID | Dataset ID | No. Evaluations |
|-----------------|------------|-----------------|----------|------------|-----------------|
| 4796            | 3549       | 300             | 5970     | 49         | 3164            |
| 4796            | 3918       | 300             | 5970     | 34536      | 3286            |
| 4796            | 9903       | 300             | 5970     | 14951      | 3634            |
| 4796            | 23         | 300             | 5971     | 10093      | 2265            |
| 5527            | 146064     | 44790           | 5971     | 3954       | 2392            |
| 5527            | 146065     | 55627           | 5971     | 43         | 3373            |
| 5527            | 9914       | 59355           | 5971     | 34536      | 3487            |
| 5527            | 145804     | 59439           | 5971     | 9970       | 3866            |
| 5527            | 31         | 60574           | 5971     | 6566       | 4254            |
| 5527            | 10101      | 74531           | 6766     | 3903       | 39155           |
| 5636            | 146064     | 43841           | 6766     | 146064     | 43785           |
| 5636            | 145804     | 46496           | 6766     | 145953     | 47439           |
| 5636            | 9914       | 49668           | 6766     | 145804     | 52737           |
| 5636            | 146065     | 50509           | 6766     | 31         | 60721           |
| 5636            | 10101      | 69158           | 6766     | 10101      | 66277           |
| 5636            | 31         | 79629           | 6767     | 146065     | 44258           |
| 5859            | 9983       | 2878            | 6767     | 145804     | 45103           |
| 5859            | 31         | 3020            | 6767     | 146064     | 46066           |
| 5859            | 37         | 3254            | 6767     | 9914       | 47410           |
| 5859            | 3902       | 3397            | 6767     | 9967       | 48624           |
| 5859            | 9977       | 3464            | 6767     | 31         | 68248           |
| 5859            | 125923     | 5047            | 6794     | 145804     | 52448           |
| 5860            | 14965      | 200             | 6794     | 3          | 55460           |
| 5860            | 9976       | 268             | 6794     | 146065     | 60779           |
| 5860            | 3493       | 389             | 6794     | 10101      | 65952           |
| 5891            | 9889       | 2584            | 6794     | 9914       | 69200           |
| 5891            | 3899       | 2587            | 6794     | 31         | 102306          |
| 5891            | 6566       | 2779            | 7607     | 14965      | 647             |
| 5891            | 9980       | 2943            | 7607     | 145976     | 677             |
| 5891            | 3891       | 3083            | 7607     | 3896       | 692             |
| 5891            | 3492       | 3317            | 7607     | 3913       | 696             |
| 5906            | 9971       | 254             | 7607     | 3903       | 699             |
| 5906            | 3918       | 259             | 7607     | 9946       | 722             |
| 5965            | 145836     | 11228           | 7607     | 9967       | 895             |
| 5965            | 9914       | 11320           | 7609     | 145854     | 1269            |
| 5965            | 3903       | 11536           | 7609     | 3903       | 1292            |
| 5965            | 10101      | 11648           | 7609     | 9967       | 1293            |
| 5965            | 9889       | 12319           | 7609     | 145853     | 1296            |
| 5965            | 49         | 12406           | 7609     | 34537      | 1452            |
| 5965            | 9946       | 13140           | 7609     | 125923     | 1494            |
| 5970            | 37         | 2829            | 7609     | 145878     | 1593            |
| 5970            | 3492       | 2947            | 5889     | 9971       | 298             |
| 5970            | 9952       | 3163            | 5889     | 3918       | 300             |
